# 1            **GSK2556286 is a novel antitubercular drug candidate effective in vivo with the** 2                                 **potential to shorten tuberculosis treatment**

## 3 4     **Authors:**

5     Eric L. Nuermberger<sup>1\*</sup>, Maria Santos Martínez-Martínez<sup>2</sup>, Olalla Sanz<sup>2</sup>, Beatriz Urones<sup>2</sup>,  
6     Jorge Esquivias<sup>2</sup>, Heena Soni<sup>1</sup>, Rokeya Tasneen<sup>1</sup>, Sandeep Tyagi<sup>1</sup>, Si-Yang Li<sup>1</sup>, Paul J.  
7     Converse<sup>1</sup>, Helena I. Boshoff<sup>3</sup>, Gregory T Robertson<sup>4</sup>, Gurdyal S Besra<sup>5</sup>, Katherine A.  
8     Abrahams<sup>5</sup>, Anna M Upton<sup>6b</sup>, Khisimuzi Mdluli<sup>6,c</sup>, Gary W Boyle<sup>7</sup>, Sam Turner<sup>7</sup>, Nader  
9     Fotouhi<sup>6</sup>, Nicholas C. Cammack<sup>2d</sup>, , Juan Miguel Siles<sup>2</sup>, Marta Alonso<sup>2</sup>, Jaime Escribano<sup>2</sup>,  
10    Joel Lelievre<sup>2</sup>, , Esther Pérez-Herrán<sup>2</sup>, Robert H. Bates<sup>2</sup>, Gareth Maher-Ewards<sup>4</sup>, David  
11    Barros<sup>2</sup>, Lluís Ballell<sup>2,a</sup>, Elena Jiménez<sup>2\*</sup>

## 12 13 14    **Affiliations:**

15    1. JHU: Center for Tuberculosis Research, Division of Infectious Diseases, Johns Hopkins  
16    University School of Medicine, Baltimore, Maryland, United States of America

17    2. GSK: Diseases of the Developing World, GlaxoSmithKline R+D Limited, Parque  
18    Tecnológico de Madrid, Calle de Severo Ochoa, 2, 28760 Tres Cantos, Madrid, Spain.

19    3. Tuberculosis Research Section, Laboratory of Clinical Immunology and Microbiology,  
20    National Institute of Allergy and Infectious Diseases (NIAID), National Institutes of Health  
21    (NIH), Bethesda, MD 20892, USA

22    4. Mycobacteria Research Laboratories, Department of Microbiology, Immunology and

23    Pathology, Colorado State University, Fort Collins, Colorado, United States of America IPK:

24    Institut Pasteur Korea, Sampyeong-dong, Seongnam-si, Gyeonggi-do, Korea

25 5. Institute of Microbiology and Infection, School of Biosciences, University of Birmingham,  
26 Birmingham B15 2TT, U.K.6. GSK: Research, GlaxoSmithKline R&D, Ware, UK.

27 6. TB Alliance: Global Alliance for Tuberculosis Drug Development, New York, NY 10005

28 7. GSK: Research, GlaxoSmithKline R&D, Ware, UK.

29

30 Current affiliations:

31 <sup>a</sup> Global Public Health Janssen R&D. Beerse, Belgium

32 <sup>b</sup> Evotec Inc, (US) Princeton, NJ 08540

33 <sup>c</sup> Bill & Melinda Gates Medical Research Institute, One Kendall Square, Building 600, Suite  
34 6-301, Cambridge, MA 02139

35 <sup>d</sup> Wellcome Trust

36

37

38 **Running Title:** Novel drug GSK2556286 shortens treatment in murine TB

39

40

41 \*To whom correspondence should be addressed: [elena.n.jimenez@gsk.com](mailto:elena.n.jimenez@gsk.com),

42 [enuermb@jhmi.edu](mailto:enuermb@jhmi.edu)

43

44 **One Sentence Summary:** GSK2556286 is a novel preclinical drug candidate for the treatment  
45 of tuberculosis with a new mode of action potentially able to contribute to the shortening of  
46 TB chemotherapy.

47

48

49 **Abstract:** As a result of a high-throughput compound screening campaign of *Mycobacterium*  
50 *tuberculosis* infected macrophages, a new preclinical drug candidate for the treatment of  
51 tuberculosis has been identified. GSK2556286 inhibits growth within human macrophages  
52 ( $IC_{50} = 0.07 \mu M$ ), is active against extracellular bacteria in cholesterol-containing culture media  
53 and exhibits no cross-resistance with known antitubercular drugs. In addition, it has shown  
54 efficacy in different mouse models of tuberculosis (TB) and has an adequate safety profile in  
55 two preclinical species. These features indicate a compound with a novel mode of action,  
56 although still not fully defined, that is effective against both multidrug or extensively-resistant  
57 (M/XDR) and drug-sensitive (DS) *M. tuberculosis* with the potential to shorten the duration of  
58 treatment in novel combination drug regimens.

59

## 60 **Introduction**

61 According to World Health Organization (WHO) estimates for 2019, 10 million people  
62 were newly diagnosed with tuberculosis (TB) and 1.4 million died (1), making TB the single  
63 greatest cause of death globally by a single infectious agent prior to the COVID-19 pandemic.  
64 Multidrug-resistant TB (MDR-TB) threatens TB control in many countries with approximately  
65 363,000 new cases globally in 2019 (1). Furthermore, the incidence of extensively drug-  
66 resistant TB (XDR-TB), defined as MDR-TB plus resistance to at least one second-line  
67 injectable drug (e.g., amikacin, kanamycin or capreomycin) and a fluoroquinolone, was over  
68 12,000 in 2019. Cases of XDR-TB have now been reported in over 100 countries (1). Despite  
69 regulatory approvals for bedaquiline (B), delamanid (D) and pretomanid (Pa) in the past decade  
70 to treat MDR or XDR-TB, there remains an unmet need for novel drugs with new mechanisms  
71 of action that are effective against drug-susceptible and drug-resistant forms of TB and shorten  
72 the duration of treatment required to prevent relapse.

73 To date, virtually all approved drugs used to treat TB were identified through  
74 phenotypic screens against actively replicating *Mycobacterium tuberculosis* in artificial  
75 nutrient-rich media, or they were repurposed from other infectious indications (2). The first-  
76 line TB drug pyrazinamide (Z) is the notable exception, having been identified by screening  
77 for activity in a murine TB model (3, 4). Few other pathogens rival *M. tuberculosis* in their  
78 ability to adapt to and persist within the infected host. Alternative screening methodologies that  
79 better represent the environmental conditions and stresses encountered by *M. tuberculosis*  
80 within the host have gained favor in recent years and may increase the efficiency with which  
81 new molecules with novel sterilizing activity are identified to complement existing TB drugs  
82 (5).

83 Over the last decade, we and others hypothesized that the macrophage, as a primary  
84 target of infection by *M. tuberculosis* and a niche in which the pathogen persists in established  
85 lesions, might represent an improved surrogate model to facilitate the discovery of novel TB  
86 drugs (6, 7). The cytochrome bc<sub>1</sub>:aa<sub>3</sub> complex inhibitor telacebec is the first TB drug to reach  
87 clinical trials that was initially identified in a phenotypic high-content screening approach using  
88 a macrophage infection model (7, 8). Nonetheless, it is active against *M. tuberculosis* in  
89 standard nutrient-rich media as well as in macrophages. More recently, novel compounds with  
90 selective activity within macrophages were identified and shown to have cholesterol-dependent  
91 activity against extracellular *M. tuberculosis in vitro* (9). Previous observations suggest that  
92 cholesterol uptake and utilization is essential for pathogen survival in the host and indicate  
93 these pathways as potential targets for novel TB drugs (10, 11) Despite these encouraging  
94 results, no molecule identified as having such macrophage-specific, cholesterol-dependent  
95 activity *in vitro* has progressed to clinical proof-of-concept studies. Here, we describe the  
96 discovery of GSK2556286, a novel inhibitor of *M. tuberculosis* extracellularly in the presence  
97 of cholesterol and within human macrophages, that provides evidence of favorable *in vivo*

98 efficacy and safety profiles justifying further development as an attractive companion drug  
99 with the potential to shorten the duration of treatment in novel combination regimens for drug-  
100 susceptible and drug-resistant TB.

## 101 **Results**

### 102 *Microbiological profile*

103 To identify compounds that effectively inhibit intracellular growth of *M. tuberculosis*,  
104 we screened a library of compounds against bacteria residing within human (THP-1)  
105 macrophage-like differentiated monocytes. The exploitation of this screening approach led to  
106 the identification of GSK2556286 (Fig. 1), a compound with potent activity (Table 1) against  
107 *M. tuberculosis* inside infected macrophages ( $IC_{50}=0.07 \mu\text{M}$  in THP-1 cells) and the unusual  
108 phenotype of requiring the presence of cholesterol to demonstrate activity in axenic culture  
109 ( $IC_{50}=0.71\text{-}2.12 \mu\text{M}$ ). The maximal % inhibition of growth achieved by GSK2556286 in these  
110 studies was 86% (range 62 to 89.4%).

111

112 **Table 1.** *In vitro* activity of GSK2556286 under various conditions

| Compound     | $IC_{50}$ ( $\mu\text{M}$ ) against <i>M. tuberculosis</i> strains H37Rv or Erdman |                        |                            |                         |                             |
|--------------|------------------------------------------------------------------------------------|------------------------|----------------------------|-------------------------|-----------------------------|
|              | Intracellular activity                                                             | Extracellular activity |                            |                         |                             |
|              | H37Rv in THP-1 cells                                                               | H37Rv in glucose media | H37Rv in cholesterol media | Erdman in glucose media | Erdman in cholesterol media |
| GSK2556286   | 0.07                                                                               | > 125                  | 2.12                       | > 50                    | 0.71                        |
| Rifampicin   | 0.0008                                                                             | 0.15                   | 0.2                        | 0.1                     | 0.1                         |
| Moxifloxacin | 0.16                                                                               | 0.11                   | 0.5                        | 0.28                    | 0.4                         |

113 GSK2556286 displayed consistent *in vitro* activity in the presence of cholesterol  
114 against a panel of clinical isolates with varying drug resistance phenotypes, including isolates  
115 from MDR and XDR-TB cases (Supplemental Table S1). The minimal inhibitory concentration  
116 of GSK2556286 that inhibited the growth of at least 90% of isolates (MIC<sub>90</sub>) was determined  
117 for 45 clinical isolates (from the National Institute of Health [NIH]), plus 3 laboratory strains,  
118 with different resistance phenotypes, including DS, MDR, XDR or other resistance phenotypes  
119 (Supplemental Table S2) as well as two additional species belonging to the *M. tuberculosis*  
120 complex, *Mycobacterium africanum* (*M. africanum*) and *Mycobacterium bovis* (*M. bovis*) in  
121 order to evaluate the activity of GSK2556286 on more genetically diverse species of the  
122 complex.

123 The MIC<sub>90</sub> was 1.2 µM (MIC range 0.3 to 1.4 µM) similar to that determined for  
124 laboratory strains, Erdman and H37Rv (0.71 and 2.12 µM, respectively) in cholesterol  
125 containing media.

126 To investigate the potential mode of action, we isolated spontaneous resistant mutants  
127 to GSK2556286 when *M. tuberculosis* Erdman cultivated *in vitro* or extracted from the lungs  
128 of infected C3HeB/FeJ mice exposed to GSK2556286 at 96 µM (8xMIC in solid media  
129 including cholesterol). In total, 29 colonies isolated from GSK2556286-containing plates in  
130 the *in vitro* and *in vivo* experiments were serially passaged on GSK2556286-containing plates  
131 and confirmed to have IC<sub>90</sub> values in the presence of cholesterol that were 10-fold higher than  
132 the wild-type parent. Whole genome sequencing and further analysis revealed that 14 out of 29  
133 mutants had mutations mapping to the *Rv1625c* gene (*cya*) (Supplemental Table S3), which  
134 encodes a Class IIIa membrane-anchored adenylyl cyclase that is non-essential for growth  
135 under routine *in vitro* conditions and has been implicated in resistance to other compounds with  
136 cholesterol-dependent activity (9). The remainder of isolated resistant mutants remain under  
137 analysis to identify new mutations responsible of resistance.

138 None of the isolated resistant mutants, with *cya* mutation, had a complete deletion of  
 139 the *cya* gene. Therefore, a *cya* knock-out mutant created in the H37Rv strain background was  
 140 evaluated to confirm the role of *cya* in GSK2556286 resistance. The IC<sub>50</sub> value in cholesterol  
 141 media was >50 μM which is 25-fold higher than the IC<sub>50</sub> value of the wild type strain. These  
 142 results demonstrated that the *cya* gene has a role in resistance to GSK2556286 in *M.*  
 143 *tuberculosis*.

144 Additional drug susceptibility testing of a selection of GSK2556286-resistant mutants  
 145 (EM08, EM10, EM19, EM63) showed susceptibility to a selection of commonly used  
 146 antitubercular drugs (Table 2, Supplemental Table S3) in axenic conditions but also showed  
 147 susceptibility in an intra macrophage assay (Table 3).

148 **Table 2.** Antitubercular drug activity against selected GSK2556286-resistant *M. tuberculosis*  
 149 strains. Data presented as the ratio of IC<sub>90</sub> mutant/IC<sub>90</sub> Wt EM01

| Compound             | Strain            |                   |                   |                   |                   |                   |
|----------------------|-------------------|-------------------|-------------------|-------------------|-------------------|-------------------|
|                      | EM05 <sup>b</sup> | EM08 <sup>a</sup> | EM10 <sup>a</sup> | EM19 <sup>a</sup> | EM33 <sup>b</sup> | EM63 <sup>a</sup> |
| <b>Moxifloxacin</b>  | 0.4               | 0.4               | 0.4               | 0.4               | 0.5               | 0.4               |
| <b>Linezolid</b>     | 0.7               | 0.7               | 0.8               | 0.6               | 1.6               | 1.2               |
| <b>Pretomanid</b>    | 0.8               | 0.8               | 0.9               | 1.1               | 1.5               | 1.3               |
| <b>Rifampicin</b>    | 0.9               | 0.8               | 0.8               | 0.8               | 1.4               | 1.4               |
| <b>Bedaquiline</b>   | 2.3               | 2.2               | 1.7               | 0.8               | ≤ 2.0             | 2.2               |
| <b>Ethionamide</b>   | 1.2               | 1.5               | 0.9               | 1.3               | 1.8               | 1.0               |
| <b>Ethambutol</b>    | 1.3               | 1.6               | 1.4               | 1.9               | 1.7               | 1.1               |
| <b>Kanamycin</b>     | 0.4               | 0.4               | 0.5               | 0.5               | 0.4               | 0.8               |
| <b>Streptomycin</b>  | 0.6               | 0.5               | 0.6               | 0.8               | 0.8               | 0.6               |
| <b>Amikacin</b>      | 0.3               | 0.3               | 0.4               | 0.3               | 0.3               | 0.4               |
| <b>D-cycloserine</b> | 1.0               | 0.8               | 0.8               | 1.1               | 0.8               | 0.9               |
| <b>PAS</b>           | 1.1               | 1.3               | 1.0               | 0.6               | 0.4               | 0.8               |

150 Key: <sup>a</sup> *cya* mutation ; <sup>b</sup> no *cya* mutation.

151 To be considered significant, the shift in activity ratio between resistant mutant and  
152 laboratory strain (wt for *cya*) should be >4.

153

154 **Table 3.** Susceptibility of THP-1 infected with a selection of GSK2556286-resistant *M.*  
155 *tuberculosis* strains to established antituberculars. Data presented as Ratio IC<sub>50</sub> mutant/IC<sub>50</sub>  
156 wild type EM01

| Compound     | Strain            |                   |
|--------------|-------------------|-------------------|
|              | EM19 <sup>a</sup> | EM33 <sup>b</sup> |
| Isoniazid    | 0.57              | 0.54              |
| Rifampicin   | 0.77              | 0.47              |
| Moxifloxacin | 0.32              | 0.30              |

157 Key: <sup>a</sup> *cya* mutation ; <sup>b</sup> no *cya* mutation.

158 To be considered significant, the shift in activity ratio between resistant mutant and  
159 laboratory strain (wt for *cya*) should be >4.

160

161 Calculation of the spontaneous frequency of resistance has, to date, been technically  
162 limited due to the challenging process of achieving acceptable growth in cholesterol-containing  
163 solid culture media. Further efforts are ongoing to refine the methodology to enable accurate  
164 assessments for spontaneous frequency of resistance to GSK2556286.

165

166 *Chemical and structural information and physicochemical properties*

167 GSK2556286A (Fig. 1) is a substituted 4-aryloxy piperidine with a low-to-moderate  
168 molecular weight (MW=329.39).

169

170



171 **Figure 1.** Chemical structure of GSK2556286

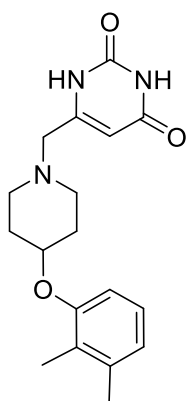

172  
173 The white-to-slightly-colored solid is crystalline with a high melting point (200°C) and  
174 a chromatographic logD and Pharmaceutical Formulation Index (PFI) of 4.4 and 6.4,  
175 respectively. GSK2556286A has excellent stability in the solid and solution states with respect  
176 to temperature and light, giving confidence that a solid oral product with a suitable shelf life  
177 can be developed. GSK2556286 is practically insoluble in water, fasted state simulated  
178 intestinal fluid (FaSSIF), fed state simulated intestinal fluid (FeSSIF) and aqueous solution in  
179 a pH range of 5-9. It is very slightly soluble in simulated gastric fluid and aqueous solution in  
180 a pH range of 2-4.

181 The Developability Classification System (DCS) class (12) borders on IIa/b at the  
182 predicted dose, suggesting potential issues with solubility and dissolution at high doses (Figure  
183 S1).

184 **Figure 2.** Synthetic route

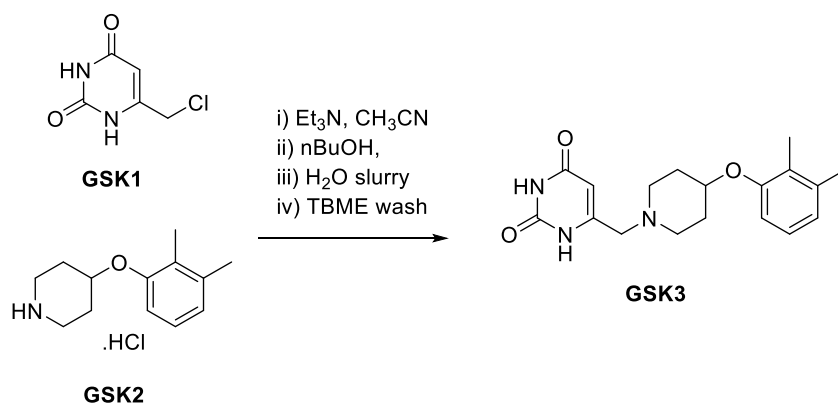

185

186 GSK2556286 was obtained in excellent yield in multi-gram scale through a nucleophilic  
187 substitution of 6-(chloromethyl)-uracil derivative (GR202687X), and 4-(2,3-  
188 dimethylphenoxy)piperidine hydrochloride salt (GSK2422021A), both commercially  
189 available, catalyzed by triethylamine.

190

191 *In vitro* absorption, distribution, metabolism and elimination (ADME) and pharmacokinetic  
192 (DMPK) profiles and potential for drug-drug interactions

193 Physicochemical properties, *in vitro* ADME, and *in vivo* DMPK profiles in preclinical  
194 species (mouse, rat, dog) were evaluated to support progression of GSK2556286 and dose  
195 prediction modelling in humans. GSK2556286 displayed notably higher solubility in simulated  
196 gastric fluid compared to that in other biologically relevant media. The compound exhibited  
197 high passive permeability in the hMDR1-MDCK-II cell line, and although it was shown to be  
198 an *in vitro* substrate for P-glycoprotein, based on its permeability and existing *in vivo*  
199 preclinical pharmacokinetic data, permeability is not expected to limit oral absorption of  
200 GSK2556286 in humans. Low intrinsic clearance ( $CL_{int}$ ) was determined in both human  
201 microsomes and hepatocytes. Low plasma protein binding (PPB) and low-to-moderate blood-  
202 to-plasma partitioning ratios (B/P) were observed in human and preclinical species  
203 (Supplemental Table S5).

204 Pharmacokinetics of GSK2556286 after intravenous and oral administration at various  
205 doses were evaluated in rodents and dogs. The compound exhibited low-to-moderate blood  
206 clearance, as predicted by  $CL_{int}$  in hepatocytes, and moderate volume of distribution.  
207 Absorption was rapid and oral bioavailability at pharmacologically relevant doses was high in  
208 mice and moderate in rats and dogs, in agreement with the expected first-pass effect  
209 (Supplemental Table S6)

210 Human PK parameters were calculated for GSK2556286 using a physiologically-based  
211 pharmacokinetic (PBPK) modelling approach (GastroPlus), based on physicochemical,  
212 preclinical (in vitro and in vivo) and in vitro human data. The PBPK models accurately  
213 predicted the IV and oral PK data from preclinical studies in mice, rats and dogs, and the  
214 prediction estimates a low human blood clearance (3.3 mL/min/kg), a moderate volume of  
215 distribution (3.5 L/kg) and high oral bioavailability ( $\geq 60\%$  for predicted clinical doses). Taking  
216 as a reference the minimum AUC and  $C_{max}$  at 10 mg/kg associated with a maximum effect as  
217 a single drug in BALB/c mice, it was predicted a dose in humans between 150 and 300 mg/day  
218 administration (based on targeting AUC and  $C_{max}$ , respectively).

219 To assess the risk of drug-drug interactions, direct inhibition of CYP isoforms was  
220 investigated by assessing the enzyme activities (CYP1A2, CYP2C9, CYP2C19, CYP2D6 and  
221 CYP3A4) in an incubation mixture of microsomes with NADPH, in the presence and absence  
222 of GSK2556286. This preliminary evaluation showed that, although it did not substantially  
223 inhibit CYP1A2, 2C9, 2C19, 2D6 and 3A4 ( $IC_{50}$  values  $>25 \mu M$ ), there is a moderate risk of  
224 CYP3A4-mediated perpetrator drug interactions assuming a CYP3A4  $IC_{50}$  value of  $25 \mu M$   
225 and predicted human PK parameters for a 150 mg dose of GSK2556286. (Supplemental Table  
226 S7).

227 All studies were conducted in accordance with the GSK Policy on the Care, Welfare and Treatment of  
228 Laboratory Animals and were reviewed the Institutional Animal Care and Use Committee either at GSK  
229 or by the ethical review process at the institution where the work was performed.

### 230 *Safety profile*

231 GSK2556286 was evaluated in single dose oral toxicity studies in the rat, dog and  
232 cynomolgus monkey and in repeat dose oral toxicity studies of up to 4 weeks duration in the  
233 Wistar Han rat and cynomolgus monkey under GLP conditions and performed according to  
234 ICH guidelines. In addition, GSK2556286 was evaluated in a battery of *in vitro* and *in vivo*  
235 safety pharmacology (respiratory, cardiovascular and neurobehavioral tests) and genotoxicity

236 studies (including an Ames test on GSK2422021, a synthetic intermediate, predicted degradant  
237 and a metabolite of GSK2556286).

238 In the definitive repeat dose oral toxicity studies in rat and monkey, adverse systemic  
239 effects were limited to the rats in the high dose group (1000 mg/kg/day). No adverse effects  
240 were observed at exposures up to an  $AUC_{0-t}=65.2 \mu\text{g}\cdot\text{h}/\text{mL}$  and  $C_{\text{max}}=5.89 \mu\text{g}/\text{mL}$  in male  
241 and  $AUC_{0-t}=129 \mu\text{g}\cdot\text{h}/\text{mL}$  and  $C_{\text{max}}=14.6 \mu\text{g}/\text{mL}$  in female rats and  $AUC_{0-t}=158 \mu\text{g}\cdot\text{h}/\text{mL}$  and  
242 mean  $C_{\text{max}}=9.96 \mu\text{g}/\text{mL}$  in the cynomolgus monkey (gender-averaged). GSK2556286 did not  
243 produce acute cardiovascular effects in rat or monkey, respiratory effects in monkey or adverse  
244 neurobehavioural effects in rats in single or repeat dose studies up to 1000 mg/kg/day and the  
245 weight of evidence from *in vitro* and *in vivo* assessments indicates that GSK2556286 does not  
246 present a genotoxic hazard to humans. The preclinical safety profile supports continued  
247 progression to a first-time-in-humans (FTIH) trial.

248 All animal studies were ethically reviewed and carried out in accordance with Animals (Scientific  
249 Procedures) Act 1986 and the GSK Policy on the Care, Welfare and Treatment of Animals.

250

### 251 *Efficacy in murine models of TB*

#### 252 *Dose-ranging activity as monotherapy*

253 GSK2556286 was tested for *in vivo* efficacy in two different murine models of chronic  
254 TB infection. In BALB/c mice, *M. tuberculosis* infection promotes development of  
255 inflammatory cellular lung lesions in which *M. tuberculosis* resides virtually entirely  
256 intracellularly, especially in macrophages, including foamy macrophages. In contrast,  
257 C3HeB/FeJ mice also form caseating granulomatous lung lesions, in which *M. tuberculosis* is  
258 found extracellularly in the acellular central caseum as well as inside neutrophils and  
259 macrophages (13, 14).

260 The compound showed a statistically significant bactericidal effect when used as a  
 261 single agent for 1 month (4 weeks) in chronic infection models in both mouse strains (Table  
 262 4). In BALB/c mice, all GSK2556286 doses tested were superior to no treatment ( $p < 0.0001$ )  
 263 and the bactericidal effect was similar in magnitude to that of isoniazid. The maximal effect  
 264 was achieved at a dose less than or equal to 10 mg/kg, which corresponded to a  $C_{max}$  of 1.38  
 265  $\mu\text{g/mL}$  and an  $AUC_{last}$  of 6.61  $\mu\text{g}\cdot\text{h/mL}$ . In C3HeB/FeJ mice, all doses above 10 mg/kg were  
 266 significantly better than no treatment ( $p < 0.05$ ) before adjustment for multiple comparisons,  
 267 although only the 40 mg/kg dose was significantly different from no treatment after adjusting  
 268 for multiple comparisons. Isoniazid was superior to each dose of GSK2556286 in C3HeB/FeJ  
 269 mice ( $p < 0.01$ ).

270

271 **Table 4.** Lung CFU counts in BALB/c and C3HeB/FeJ mice after 4 weeks of GSK2556286  
 272 treatment

| Regimen             | Mean ( $\pm$ SD) lung CFU counts |                 |                  |                 |                 |                              |
|---------------------|----------------------------------|-----------------|------------------|-----------------|-----------------|------------------------------|
|                     | BALB/c mice                      |                 |                  | C3HeB/FeJ mice  |                 |                              |
|                     | Week -8                          | Day 0           | Month 1          | Week -8         | Day 0           | Month 1                      |
| Untreated           | 1.95 $\pm$ 0.14                  | 6.84 $\pm$ 0.23 | 6.71 $\pm$ 0.34  | 1.68 $\pm$ 0.10 | 7.00 $\pm$ 0.77 | 7.42 $\pm$ 0.95              |
| INH (10 mg/kg)      |                                  |                 | 5.54 $\pm$ 0.41* |                 |                 | 4.93 $\pm$ 0.46*             |
| GSK'286 (10 mg/kg)  |                                  |                 | 5.63 $\pm$ 0.12* |                 |                 | 6.52 $\pm$ 0.93              |
| GSK'286 (40 mg/kg)  |                                  |                 | 5.69 $\pm$ 0.05* |                 |                 | 6.30 $\pm$ 0.54 <sup>#</sup> |
| GSK'286 (100 mg/kg) |                                  |                 | 5.82 $\pm$ 0.08* |                 |                 | 6.31 $\pm$ 1.00              |
| GSK'286 (200 mg/kg) |                                  |                 | 5.50 $\pm$ 0.18* |                 |                 | 6.30 $\pm$ 0.96              |

273 Key: \* $p < 0.01$  compared to untreated group. <sup>#</sup> $p < 0.05$  compared to untreated group

274 GSK'286=GSK2556286

275

276

277 *Contribution to bactericidal activity in combination therapy*

278 Given the requirement for combination chemotherapy in the treatment of TB and the  
279 urgent need for novel regimens comprised of drugs that retain activity against MDR- and XDR-  
280 TB strains, the efficacy of GSK2556286 was evaluated in a subacute infection model in  
281 BALB/c mice that enables the evaluation of drug regimens against a higher bacterial burden  
282 (15). GSK2556286 (50 mg/kg) was co-administered with bedaquiline (B) and pretomanid (Pa)  
283 and the efficacy of this regimen was compared to that of BPa plus linezolid (L), which  
284 comprises a novel short-course regimen (16, 17) that was recently approved for treatment of  
285 XDR-TB and refractory MDR-TB. The addition of GSK2556286 to the BPa combination  
286 significantly increased efficacy, compared to BPa alone, after two months of treatment  
287 ( $p < 0.001$ ) (Table 5).

288 **Table 5.** Efficacy of GSK2556286 when combined with B and Pa in a BALB/c mouse model  
289 of TB. For comparison, the three-drug combination BPa+L is included

| Regimen        | Mean lung log <sub>10</sub> CFU (±SD) |             |             |
|----------------|---------------------------------------|-------------|-------------|
|                | Day 0                                 | Month 1     | Month 2     |
| Untreated      | 7.87 ± 0.12                           |             |             |
| BPa            |                                       | 5.54 ± 0.32 | 3.17 ± 0.20 |
| BPa+L          |                                       | 4.73 ± 0.28 | 0.73 ± 0.52 |
| BPa+GSK2556286 |                                       | 5.39 ± 0.18 | 1.74 ± 0.76 |

290

291 *Contribution to treatment-shortening activity in combination therapy*

292 Although the bactericidal activity of this novel 3-drug combination was not as great as  
293 that of BPaL ( $p < 0.01$ ), the 6-log<sub>10</sub> magnitude of the killing effect and clear contribution of  
294 GSK2556286 to the combination led us to assess the potential of GSK2556286 to contribute  
295 sterilizing activity when incorporated into 3- and 4-drug regimens with B, Pa and L in the  
296 subacute BALB/c mouse infection model, using the proportion of mice with relapse-free cure

297 as the primary endpoint. The standard of care RHZ (rifampicin+isoniazid+pyrazinamide) was  
298 also included as reference for bactericidal outcome after 1 and 2 months of treatment and  
299 relapse endpoint after 4 months based on previous data indicating RHZ requires more than 3  
300 months to observe significant reductions in the proportion of mice that relapse (18, 19).

301 After 2 months of treatment, regimens combining GSK2556286 with BP<sub>a</sub>, BL or BP<sub>a</sub>L  
302 resulted in significantly lower lung CFU counts compared to the first-line RHZ control  
303 ( $p < 0.0001$ ,  $p = 0.0417$ , and  $p < 0.0001$ , respectively) (Table 6). BP<sub>a</sub>+GSK2556286 and  
304 BP<sub>a</sub>L+GSK2556286 were not significantly different from BP<sub>a</sub>L at this time point, but  
305 BL+GSK2556286 and PaL+GSK2556286 were significantly less active than BP<sub>a</sub>L  
306 ( $p < 0.0001$ ). With respect to the relapse outcome, treatment with BP<sub>a</sub>L, BP<sub>a</sub>+GSK2556286 and  
307 BP<sub>a</sub>L+GSK2556286 for 2 months resulted in lower proportions of mice relapsing compared to  
308 treatment with RHZ for 4 months, indicating the treatment-shortening potential of regimens  
309 combining GSK2556286 with BP<sub>a</sub> and BP<sub>a</sub>L, compared to RHZ. BL+GSK2556286 required  
310 3 months of treatment to achieve a relapse rate lower than RHZ for 4 months.

311 The proportions of mice relapsing after 2 and 3 months of treatment with BP<sub>a</sub>L,  
312 BP<sub>a</sub>+GSK2556286 and BP<sub>a</sub>L+GSK2556286 did not significantly differ, indicating that  
313 GSK2556286 could replace L in the BP<sub>a</sub>L regimen without loss of efficacy. On the other hand,  
314 PaL+GSK2556286 was associated with significantly more relapses ( $p < 0.0001$ ) at all time  
315 points and BL+GSK2556286 was associated with more relapses ( $p = 0.0005$ ) after 2 months of  
316 treatment but was similar after 3 and 4 months.

317

318

319 **Table 6.** Efficacy of GSK2556286 when combined with various 2- and 3-drug combinations  
 320 of B, Pa and L in a BALB/c mouse model of TB.

| Regimen         | Mean lung log <sub>10</sub> CFU (±SD) |           |           | Proportion of mice relapsing after treatment for: |          |          |
|-----------------|---------------------------------------|-----------|-----------|---------------------------------------------------|----------|----------|
|                 | Day 0                                 | Month 1   | Month 2   | 2 months                                          | 3 months | 4 months |
| Untreated       | 7.30 ±<br>0.10                        |           |           |                                                   |          |          |
| RHZ             |                                       | 5.12±0.14 | 2.55±0.07 | NT                                                | NT       | 7/15     |
| BPaL            |                                       | 3.10±0.17 | 0.00±0.00 | 4/15                                              | 1/15     | NT       |
| BPa+GSK2556286  |                                       | 3.77±0.36 | 0.27±0.54 | 5/15                                              | 1/15     | 0/15     |
| BL+GSK2556286   |                                       | 4.16±0.34 | 1.91±0.33 | 14/15                                             | 2/14*    | 1/14*    |
| PaL+GSK2556286  |                                       | 5.19±0.19 | 2.87±0.34 | 15/15                                             | 15/15    | 11/15    |
| BPaL+GSK2556286 |                                       | 2.75±0.36 | 0.00±0.00 | 2/15                                              | 0/15     | NT       |

321 Key: NT=Not tested. \*, one of 15 mice died due to gavage accident and could not be assessed  
 322 for relapse.

323

324 *Activity in combination therapy in C3HeB/FeJ mouse model*

325 These 3- and 4-drug regimens in which GSK2556286 was either added to BPaL or  
 326 replaced B, Pa or L were also evaluated for CFU reduction in C3HeB/FeJ mice infected with  
 327 *M. tuberculosis* H37Rv. After one month of treatment, none of these regimens was statistically  
 328 significantly different from the RHZ or BPaL regimens (Figure 3). After two months, only  
 329 PaL+GSK2556286 was significantly worse than RHZ (p=0.0006), suggesting GSK2556286  
 330 could replace either Pa or L in the BPaL regimen without loss of efficacy compared to BPaL  
 331 or RHZ (group mean CFU counts are presented in Supplemental).



332 **Figure 3.** Efficacy of GSK2556286 (G) when combined with the various 2- and 3-drug  
333 combinations of B (bedaquiline), Pa (pretomanid) and L (linezolid) for 1 month (A) or 2  
334 months (B) in a C3HeB/FeJ mouse model of TB. For comparison, B, BG and BPaL are  
335 included. Bars indicates median CFU counts. Median CFU on Day 0, the start of treatment, is  
336 indicated by dotted line.

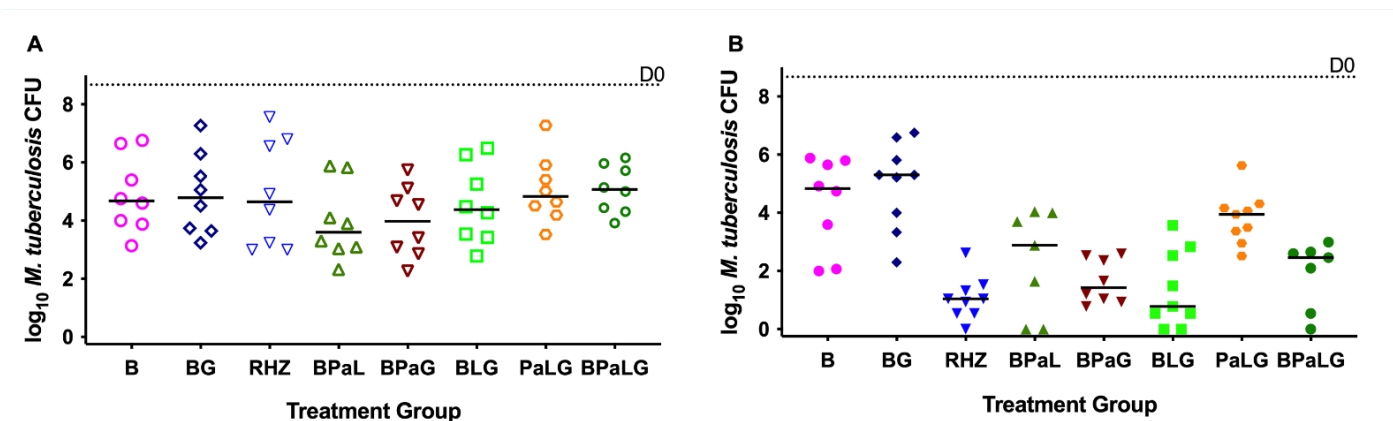

## 338 Discussion

339 GSK2556286 is a novel, small molecule, antitubercular compound identified from  
340 high-throughput intramacrophage screening that is active against a variety of drug-sensitive  
341 and drug-resistant clinical isolates in axenic culture in the presence of cholesterol as carbon  
342 source. Cholesterol uptake, catabolism and broader utilization are important for maintenance  
343 of the pathogen in the host, and other inhibitors of *M. tuberculosis* with activity revealed in the  
344 presence of cholesterol have been identified (9, 10, 11).

345 To further understand the potential cholesterol-dependent mode of action,  
346 GSK2556286-resistant *M. tuberculosis* clones were isolated on media containing cholesterol  
347 as the primary carbon source and analyzed by whole genome sequencing. Approximately half  
348 of the resistant clones sequenced harbored mutations in the gene for the membrane-anchored  
349 adenylyl cyclase, *cya*, without altering the viability of the bacteria at least in laboratory  
350 conditions. The observed frameshift and premature stop codon mutations indicated that loss of

351 *cya* function results in resistance to GSK2556286 and this was confirmed with the *cya*  
352 knockout-mutant. These findings are similar to other recently discovered cholesterol-  
353 dependent antitubercular leads that directly activate *cya* and induce bacterial cAMP production  
354 and inhibit cholesterol production in wild type *M. tuberculosis* in an *cya*-dependent fashion [9].  
355 Increased intracellular levels of cAMP, one of the main secondary messengers in the cell, may  
356 negatively regulate cholesterol and propionate utilization by *M. tuberculosis*, reducing bacterial  
357 growth when it is dependent upon utilizing these carbon sources (9, 20, 21). Therefore,  
358 GSK2556286 may likewise act by activating *cya*, inducing cAMP production and negatively  
359 regulating cholesterol and propionate utilization. Ongoing studies to further evaluate the mode  
360 of action of GSK2556286, including its effects on cAMP levels and its impact in the presence  
361 of cholesterol will be reported separately. Despite the need for further elucidation of the  
362 specific mechanism of action, GSK2556286-resistant mutants remained susceptible to a list of  
363 well-known antitubercular drugs that suggests the novelty of this mechanism.

364         Given that the macrophage is a major cellular niche for *M. tuberculosis*, blocking  
365 replication of the bacterium in this environment may enhance existing or future TB drug  
366 regimens (2, 6). However, human TB disease is also characterized by development of caseation  
367 necrosis leading to closed caseous foci and cavities in which *M. tuberculosis* is found  
368 extracellularly, in caseum. As caseum is also rich in cholesterol, those bacilli persisting  
369 extracellularly in the acellular zones of caseous foci could also be susceptible to GSK2556286,  
370 as they are in axenic culture in the presence of cholesterol (22, 23).

371         To demonstrate this therapeutic potential, GSK2556286 was evaluated, alone and in  
372 combination with other drugs, in two murine TB models, one of which (C3HeB/FeJ mice) is  
373 distinguished from other mouse models by its propensity to develop caseating lung lesions (24-  
374 26). When used alone, GSK2556286 exhibited bactericidal effects in chronic infection models  
375 in both BALB/c mice, where virtually all bacteria reside intracellularly, and in C3HeB/FeJ

376 mice, which form large caseating granulomas in which most bacteria are extracellular in  
377 caseum.

378         When used in combination to identify novel efficacious combination drug regimens  
379 including GSK2556286 in both models of TB, BALB/c and C3HeB/FeJ mice, GSK2556286  
380 exhibited its potential to replace linezolid (L) in the BPaL regimen without loss of sterilizing  
381 activity. BPaL has been recently approved as a novel short-course oral treatment for XDR-TB  
382 and treatment refractory MDR-TB (27).

383         Although the individual contribution of GSK2556286 to the regimen's sterilizing  
384 activity was not shown directly in these studies, there was no loss of bactericidal or sterilizing  
385 activity of the BPaL regimen when GSK2556286 was substituted for linezolid in the BALB/c  
386 mouse infection model. The contribution of linezolid to the sterilizing activity of the BPaL  
387 regimen has been repeatedly demonstrated in this model (17) and thus these data suggest that  
388 GSK2556286 is likely to be contributing to the overall efficacy of the BPa+GSK2556286  
389 regimen.

390         Furthermore, although there were more relapses after 2 and 3 months of treatment when  
391 GSK2556286 was substituted for Pa in BPaL (14 vs 4, and 2 vs 1, respectively),  
392 BL+GSK2556286 treatment for 3 and 4 months resulted in fewer relapses (2 and 1,  
393 respectively) than RHZ treatment for 4 months (7 relapses) in BALB/c mice and  
394 BL+GSK2556286 had bactericidal activity that could not be distinguished from RHZ or BPaL  
395 in C3HeB/FeJ mice.

396         In summary, GSK2556286 acts via a novel model of action to achieve significant in  
397 vivo activity in murine models displaying both cellular and extracellular lesion compartments.  
398 This result combined with the compound's low clearance values across a number of species,  
399 low propensity towards drug-drug interaction liabilities and adequate preliminary toxicology  
400 profile (genotoxicity, safety pharmacology, general toxicology) present evidence supporting

401 its progression as a new clinical candidate for the treatment of both MDR and drug-susceptible  
402 TB that has potential to contribute to the shortening of TB chemotherapy.

403

#### 404 **Materials and Methods**

405 *Microbiological assays.* The MIC of GSK2556286 against extracellular *M. tuberculosis*  
406 laboratory strains was determined in standard media with glucose as a carbon source and also  
407 in media supplemented with cholesterol. For MIC determination in the absence of cholesterol,  
408 approximately  $1 \times 10^5$  CFU/mL of *M. tuberculosis* H37Rv (ATCC 25618) or Erdman (TMCC  
409 107) was added to 96-well flat-bottom plates containing ten two-fold drug dilutions of  
410 GSK2556286 in Middlebrook 7H9 medium (Difco) supplemented with 2% glucose, 0.025%  
411 Tween 80, 0.05% Tyloxapol and 10% albumin-dextrose-catalase [ADC]). Plates were placed  
412 in a sealed box to prevent drying and incubated at 37°C for 6 days. 25  $\mu$ L of Resazurin solution  
413 (38.6  $\mu$ M) (Resazurin Tablets for Milk Testing; Ref 330884Y' VWR International Ltd, in 30  
414 mL of phosphate buffered saline [PBS]) were added to each well. Fluorescence was measured  
415 after 48 hours at 37°C using a SpectraMax M5 microplate reader (Molecular Devices). Non-  
416 linear regression analysis was used to fit the normalized fluorescence results into dose response  
417 curves and IC<sub>50</sub> and IC<sub>90</sub> values were determined using Excel Add-in XLFit. Reported data are  
418 the average of at least two experiments.

419 The MIC of GSK2556286 in media containing cholesterol as the carbon source was  
420 determined against *M. tuberculosis* H37Rv and Erdman strains with a final inoculum of  
421 approximately  $1.4 \times 10^6$  CFU/mL. Bacteria grown in 7H9 medium supplemented with 2%  
422 glucose and 0.025% Tyloxapol to an optical density (OD) around 0.5 at 600 nm were pelleted  
423 by centrifugation and washed twice with cholesterol media (Middlebrook 7H9 supplemented  
424 with 1 g/L KH<sub>2</sub>PO<sub>4</sub>, 2.5 g/L Na<sub>2</sub>HPO<sub>4</sub>, 0.5 g/L asparagine, 50 mg/L ferric ammonium citrate,

425 10 mg/L MgSO<sub>4</sub>·7H<sub>2</sub>O, 0.5 mg/L CaCl<sub>2</sub>, and 0.1 mg/L ZnSO<sub>4</sub> and 0.01% cholesterol as the  
426 sole carbon source). Pellets were resuspended in cholesterol media and incubated for at least 3  
427 days at 37°C. Plates containing GSK2556286 were inoculated and incubated at 37°C for an  
428 additional 7 days, resazurin solution (38.6 μM) was added and incubated for 48 hours before  
429 fluorescence was measured. Rifampicin (Sigma R3501) was used as positive control up to 0.36  
430 μM. IC<sub>50</sub> and IC<sub>90</sub> values were determined as described above. Reported data are the average  
431 of at least two experiments.

432 The intracellular antibacterial activity of GSK2556286 was determined using human  
433 THP-1 cells maintained in RPMI-1640 media containing 10% fetal bovine serum (FBS), 1mM  
434 of pyruvate, and 2mM of L-glutamine, and incubated at 37 °C with 5% CO<sub>2</sub>. An *M. tuberculosis*  
435 H37Rv reporter strain carrying the firefly luciferase gene (under the control of the *hsp60*  
436 promoter) was grown in Middlebrook 7H9 broth supplemented with 10% ADC, 0.4% glycerol  
437 and 0.05% Tween 80 until the mid-log phase. THP-1 cells were infected at a multiplicity of  
438 infection (MOI) of 1:1 in antibiotic-free RPMI-1640 media containing 10% FBS, 1 mM of  
439 pyruvate, 2 mM of L-glutamine and 20 nM of phorbol 12-myristate 13-acetate (PMA) for 4  
440 hours at 37°C with 5% CO<sub>2</sub>. Following a 4-hour incubation period, infected cells were  
441 harvested and plated onto 96-well plates containing either GSK2556286 (up to 25 μM),  
442 rifampicin up to 0.73 μM as positive control, or dimethyl sulfoxide (DMSO) (<0.5% final  
443 concentration). After 5 days of incubation, cell luminescence was measured using the Bright-  
444 Glo Promega kit and SpectraMax M5 plate reader. The percentages of inhibition were  
445 calculated relative to the DMSO control well. For each compound, the average value of the  
446 duplicate samples was calculated, and a sigmoidal dose-response (variable slope) curve was fit  
447 by nonlinear regression (GraphPad) to enable estimation of the IC<sub>50</sub>.

448

449 *MIC determination against a panel of clinical isolates on cholesterol-based media.* The MIC  
450 of GSK2556286 was determined against 45 clinical isolates of *M. tuberculosis* with different  
451 resistance phenotypes maintained by the National Institutes of Health. *M. tuberculosis* strains  
452 HN878, CDC1551, Erdman and H37Rv were included as controls. Individual *M. africanum*  
453 and *M. bovis* isolates were included to represent other members of the *M. tuberculosis* complex.  
454 Briefly, bacteria were grown to an OD of 0.2-0.6 in the 7H9 medium supplemented with bovine  
455 serum albumin, Tyoxapol and cholesterol as a sole carbon source and added ( $2 \times 10^4$  bacteria  
456 per well) to 96-well plates containing GSK2556286 (in concentrations ranging up to 50  $\mu\text{M}$ ).  
457 Para-aminosalicylic acid (PAS), isoniazid, and bedaquiline were used as positive controls and  
458 DMSO as a negative control. Plates were incubated for up to 3 weeks at 37°C. At various time  
459 points, plates were read with an inverted enlarging mirror plate reader and graded as either  
460 growth or no growth to determine the MIC. The time point was dependent on the growth rate  
461 of the strain in the drug-free control medium (generally between 1-2 weeks). After 2 weeks of  
462 incubation, resazurin was added to plates. Following incubation at 37°C for 24 hours, results  
463 were read visually with an inverted enlarging mirror plate reader (blue = growth inhibition,  
464 pink= growth). The lowest concentration to inhibit growth was defined as the MIC.

465

466 *Selection of GSK2556286 resistant mutants in vitro.* The MIC of GSK2556286 in cholesterol-  
467 containing agar medium was used to establish the concentration of GSK2556286 for the  
468 selection of resistant mutants. Stocks of *M. tuberculosis* Erdman ( $2 \times 10^9$  CFU/mL) were thawed  
469 and diluted 1:5 in PBS, and 0.1 mL aliquots were plated on 7H11 agar media containing  
470 cholesterol or cholesterol plus dextrose as carbon sources, with or without GSK2556286 at 96  
471  $\mu\text{M}$  (8xMIC). The bacterial colonies were counted after 4 or 6 weeks of incubation.

472 For genetic characterization, genomic DNA from single colonies was extracted with  
473 the MasterPure™ DNA Purification Kit from Epicentre (Cat. No. MCD85201) according to

474 the manufacturer's instructions. DNA libraries were generated following the Nextera XT  
475 Illumina protocol (Nextera XT Library Prep kit (FC-131-1024)). 0.2ng/ul purified gDNA was  
476 used to initiate the protocol. The multiplexing step was performed using Nextera XT Index Kit  
477 (FC-131-1096). The libraries were sequenced using a 2x150pb paired-end run, NextSeq high  
478 output reagent kit on a NextSeq Sequencer according to manufacturer's instructions (Illumina).  
479 Quality assessment was performed using prinseq-lite program (28) applying following  
480 parameters: Min\_length: 50, Trim\_qual\_right: 20, Trim\_qual\_type: mean and  
481 Trim\_qual\_window: 20. R1 and R2 from Illumina sequencing were joined using fastq-join  
482 from ea-tools suite (29).

483

484 *Creation of Rv1625c knock-out mutant.* A knock-out mutant was created in the H37Rv strain  
485 by replacing *Rv1625c* with a hygromycin resistance cassette using the recombineering  
486 approach developed by Murphy et al (30). Gene replacement was confirmed by PCR.

487 *Selection of GSK2556286-resistant mutants in vivo.* C3HeB/FeJ mice received a low-dose  
488 aerosol infection with 31 CFU/ lung of *M. tuberculosis* Erdman. Starting 8 weeks post-  
489 infection, mice were given oral doses of GSK2556286 at 100 mg/kg, 5 days a week for 6 weeks.  
490 Lungs were harvested and homogenates were prepared and plated in serial 10-fold dilutions on  
491 plates with and without GSK2556286 at 100  $\mu$ M.

492

493 *Mouse efficacy studies*

494 All housing and procedures involving mice were approved by the Institutional Animal Care  
495 and Use Committee at Johns Hopkins University School of Medicine and the GSK Policy on  
496 the Care, Welfare and Treatment of Animals.



497 *Mice.* Female specific pathogen-free BALB/c mice and C3HeB/FeJ mice, each aged 5-6 weeks,  
498 were purchased from Charles River (Wilmington, MA) and Jackson Laboratories (Bar Harbor,  
499 ME), respectively. Mice were housed in a bio-safety level 3 animal facility.

500 *Mycobacterial Strain.* *M. tuberculosis* H37Rv was mouse-passaged, frozen in aliquots and sub-  
501 cultured in Middlebrook 7H9 broth with 10% oleic acid-albumin-dextrose-catalase (OADC)  
502 (Fisher, Pittsburgh, PA) and 0.05% Tween 80 prior to infection.

503 *Infection.* BALB/c and C3HeB/FeJ mice were infected with *M. tuberculosis* H37Rv, using the  
504 Inhalation Exposure System (Glas-col, Terre Haute, IN). The chronic infection model in both  
505 mouse strains was initiated with a thawed aliquot of the bacterial culture that was diluted 1:50  
506 with sterile PBS for infecting BALB/c mice and 1:100 for infecting C3HeB/FeJ mice with the  
507 goal of implanting approximately 100 and 50-75 CFU, respectively, in the lungs. Mice were  
508 held for 6 weeks before beginning treatment. The subacute infection model in BALB/c mice  
509 was initiated with a late log-phase culture in 7H9 broth (optical density at 600 nm of 0.8-1)  
510 with the goal of implanting 3.5-4 log<sub>10</sub> CFU. Mice were held for 2 weeks before beginning  
511 treatment.

512 *Drug treatments.* For dose-ranging monotherapy studies, GSK2556286 in doses of 10, 40, 100  
513 and 200 mg/kg body weight was formulated in 1% methylcellulose and isoniazid 10 mg/kg  
514 was prepared in distilled water. Drugs were administered orally via gavage once daily, five  
515 days per week, for four weeks. Positive and negative controls received isoniazid and no  
516 treatment, respectively.

517 For experiments evaluating the activity of GSK2556286 in combinations with bedaquiline,  
518 pretomanid and linezolid, GSK2556286 and isoniazid were formulated as described above.  
519 Other drugs were formulated and administered at the indicated dose as previously described  
520 (16, 17): rifampicin (10 mg/kg) and pyrazinamide (150 mg/kg) in distilled water, bedaquiline



521 (25 mg/kg) in acidified 10% (2-Hydroxypropyl)- $\beta$ -cyclodextrin (HPCD) solution, pretomanid  
522 (100 mg/kg) in 20% HPCD and lecithin (CM-2) formulation and linezolid (100 mg/kg) in 0.5%  
523 methylcellulose.

524 *Assessment of efficacy.* Two microbiological outcomes were assessed: lung CFU counts during  
525 treatment and the proportion of mice relapsing after completion of treatment. Lungs were  
526 collected and homogenized in glass grinders at pre-specified time points during and after drug  
527 treatment. The homogenates were serially diluted in PBS and plated on Middlebrook 7H11  
528 agar plates supplemented with 10% (v/v) OADC (GIBCO) and cycloheximide [10 mg/mL],  
529 carbenicillin [50 mg/mL], polymixin B [25 mg/mL] and trimethoprim [20 mg/mL].  
530 Homogenates from mice receiving drug combinations were plated on the same agar media but  
531 with the addition of activated charcoal powder (0.4%w/v) to prevent carryover of bedaquiline.  
532 Colonies were counted after 4 and 6 weeks of incubation at 37°C to ensure all cultivable  
533 bacteria would be detected. Relapse after 2, 3 and 4 months of treatment with drug  
534 combinations was assessed by holding cohorts of 15 mice per group for an additional 3 months  
535 without treatment before sacrificing the mice and plating the entire lung homogenate, as  
536 described above. Relapse was defined by detection of  $\geq 1$  CFU.

537 *Statistical analysis.* CFU counts (x) were log-transformed (as x+1) before analysis. Group  
538 means were compared by one-way analysis of variance with Dunnett's post-test to control for  
539 multiple comparisons. Group relapse proportions were compared using Fisher's exact test,  
540 adjusting for multiple comparisons. The Kruskal-Wallis test and Dunn's non-parametric post-  
541 test to adjust for multiple comparisons were used to test for significance on non-normally  
542 distributed CFU data from C3HeB/FeJ mice. GraphPad Prism version 6 (GraphPad, San Diego,  
543 CA) was used for all analyses. Use of 15 mice per group for relapse assessment provides  
544 approximately 80% power to detect 40 percentage point differences in the relapse rate, after

545 setting alpha at 0.01 to adjust for up to 5 simultaneous two-sided comparisons. Smaller  
546 differences may not be meaningful in terms of shortening the duration of treatment.

547 Data will be made publicly available upon publication and upon request for peer review.

548

549 **Acknowledgments:** We would like to thank to Kevin Pethe and Jichan Jang for their  
550 collaboration with the screening at Institute Pasteur Korea. We would like to thank Ken  
551 Duncan and Peter Warner from the Bill & Melinda Gates Foundation, Steve Berthel from the  
552 New Venture Fund, and GSK technical and administrative support staff. We would like to  
553 thank Dirk Schanppinger and Curtiss Engelhart for providing KO strain and Anne Lenaerts  
554 for assistance with the *in vitro* and *in vivo* selection of resistant mutants.

555 **Funding:** This work was funded, in part, by a Tres Cantos Open Lab Foundation (grant  
556 number TC049), by the European Union's 7th framework program (FP7- 2007-2013)  
557 under the Orchid grant agreement No. 261378 and in part by the Division of  
558 Intramural Research of the NIAID/ NIH This work was supported, in whole or in part,  
559 by the Bill & Melinda Gates Foundation [OPP1178195.]. Under the grant conditions  
560 of the Foundation, a Creative Commons Attribution 4.0 Generic License has already  
561 been assigned to the Author Accepted Manuscript version that might arise from this  
562 submission.

563

564

565

566 **References**

567

568 1. Global Tuberculosis Report 2020. World Health Organization, 2020. Geneva.

569 2. Cole ST. 2016. Inhibiting *Mycobacterium tuberculosis* within and without. *Philos*

570 *Trans R Soc Lond B Biol Sci* 371. 2016 Nov 5;371(1707):20150506. doi:

571 10.1098/rstb.2015.0506

572 3. Kushner S, Dalalian D, Sanjurjo JL, Bach Jr. FL, Safir SR, Smith Jr. VK, Williams

573 JH. 1952. Experimental Chemotherapy of Tuberculosis. II. The Synthesis of

574 Pyrazinamides and Related Compounds. *J Am Chem Soc* 74:3617-3621.

575 4. Malone L, Schurr A, Lindh H, Mc KD, Kiser JS, Williams JH. 1952. The effect of

576 pyrazinamide (aldinamide) on experimental tuberculosis in mice. *Am Rev Tuberc*

577 65:511-8.

578 5. Parish T. 2020. In vitro drug discovery models for *Mycobacterium tuberculosis*

579 relevant for host infection. *Expert Opin Drug Discov* 15:349-358.

580 6. Christophe T, Jackson M, Jeon HK, Fenistein D, Contreras-Dominguez M, Kim J,

581 Genovesio A, Carralot JP, Ewann F, Kim EH, Lee SY, Kang S, Seo MJ, Park EJ,

582 Skovierova H, Pham H, Riccardi G, Nam JY, Marsollier L, Kempf M, Joly-Guillou

583 ML, Oh T, Shin WK, No Z, Nehrbass U, Brosch R, Cole ST, Brodin P. 2009. High

584 content screening identifies decaprenyl-phosphoribose 2' epimerase as a target for

585 intracellular antimycobacterial inhibitors. *PLoS Pathog* 5:e1000645.

586 7. de Jager VR, Dawson R, van Niekerk C, Hutchings J, Kim J, Vanker N, van der

587 Merwe L, Choi J, Nam K, Diacon AH. 2020. Telacebec (Q203), a New

588 Antituberculosis Agent. *N Engl J Med* 382:1280-1281.

589 8. Pethe K, Bifani P, Jang J, Kang S, Park S, Ahn S, Jiricek J, Jung J, Jeon HK, Cechetto

590 J, Christophe T, Lee H, Kempf M, Jackson M, Lenaerts AJ, Pham H, Jones V, Seo

- 591 MJ, Kim YM, Seo M, Seo JJ, Park D, Ko Y, Choi I, Kim R, Kim SY, Lim S, Yim S-  
592 A, Nam J, Kang H, Kwon H, Oh C-T, Cho Y, Jang Y, Kim J, Chua A, Tan BH,  
593 Nanjundappa MB, Rao SPS, Barnes WS, Wintjens R, Walker JR, Alonso S, Lee S,  
594 Kim J, Oh S, Oh T, Nehrbass U, Han S-J, No Z, et al. 2013. Discovery of Q203, a  
595 potent clinical candidate for the treatment of tuberculosis. *Nature Medicine* 19:1157.
- 596 9. VanderVen BC, Fahey RJ, Lee W, Liu Y, Abramovitch RB, Memmott C, Crowe AM,  
597 Eltis LD, Perola E, Deininger DD, Wang T, Locher CP, Russell DG. 2015. Novel  
598 inhibitors of cholesterol degradation in *Mycobacterium tuberculosis* reveal how the  
599 bacterium's metabolism is constrained by the intracellular environment. *PLoS Pathog*  
600 11:e1004679.
- 601 10. Pandey AK, Sassetti CM. 2008. Mycobacterial persistence requires the utilization of  
602 host cholesterol. *Proc Natl Acad Sci U S A* 105:4376-80.
- 603 11. LeeW, Vanderven BC, Fahey RJ, Russell DG. Intracellular Mycobacterium  
604 tuberculosis exploits host-derived fatty acids to limit metabolic stress. *The Journal of*  
605 *Biological Chemistry*, 10 Jan 2013, 288(10):6788-6800.  
606 DOI: 10.1074/jbc.m112.445056
- 607 12. Rosenberger J, Butler J, Dressman J. 2018. A Refined Developability Classification  
608 System. *J Pharm Sci* 107:2020-2032.
- 609 13. Rosenthal IM, Tasneen R, Peloquin CA, Zhang M, Almeida D, Mdluli KE,  
610 Karakousis PC, Grosset JH, Nuermberger EL. 2012. Dose-ranging comparison of  
611 rifampin and rifapentine in two pathologically distinct murine models of tuberculosis.  
612 *Antimicrob Agents Chemother* 56:4331-40. Driver ER, Ryan GJ, Hoff DR,
- 613 14. Irwin SM, Basaraba RJ, Kramnik I, Lenaerts AJ. 2012. Evaluation of a mouse model  
614 of necrotic granuloma formation using C3HeB/FeJ mice for testing of drugs against  
615 *Mycobacterium tuberculosis*. *Antimicrob Agents Chemother* 56:3181-95.

- 616 15. Nuermberger EL. 2017. Preclinical Efficacy Testing of New Drug Candidates.  
617 Tuberculosis and the Tubercle Bacillus 2<sup>nd</sup> Edition (CH 13; pp. 269-293)  
618 ISBN:9781555819552. DOI:10.1128/9781555819569.ch13.
- 619 16. Conradie F, Diacon AH, Ngubane N, Howell P, Everitt D, Crook AM, Mendel CM,  
620 Egizi E, Moreira J, Timm J, McHugh TD, Wills GH, Bateson A, Hunt R, Van  
621 Niekerk C, Li M, Olugbosi M, Spigelman M. 2020. Treatment of Highly Drug-  
622 Resistant Pulmonary Tuberculosis. N Engl J Med 382:893-902.
- 623 17. Tasneen R, Betoudji F, Tyagi S, Li SY, Williams K, Converse PJ, Dartois V, Yang T,  
624 Mendel CM, Mdluli KE, Nuermberger EL. 2016. Contribution of Oxazolidinones to  
625 the Efficacy of Novel Regimens Containing Bedaquiline and Pretomanid in a Mouse  
626 Model of Tuberculosis. Antimicrob Agents Chemother 60:270-7.
- 627 18. Li SY, Tasneen R, Tyagi S, Soni H, Converse PJ, Mdluli K, Nuermberger EL. 2017.  
628 Bactericidal and Sterilizing Activity of a Novel Regimen with Bedaquiline,  
629 Pretomanid, Moxifloxacin, and Pyrazinamide in a Murine Model of Tuberculosis.  
630 Antimicrob Agents Chemother 61.
- 631 19. Williams K, Minkowski A, Amoabeng O, Peloquin CA, Taylor D, Andries K, Wallis  
632 RS, Mdluli KE, Nuermberger EL. 2012. Sterilizing activities of novel combinations  
633 lacking first- and second-line drugs in a murine model of tuberculosis. Antimicrob  
634 Agents Chemother 56:3114-20.
- 635 20. Johnson RM, Bai G, DeMott CM, Banavali NK, Montague CR, Moon C, Shekhtman  
636 A, VanderVen B, McDonough KA. 2017. Chemical activation of adenylyl cyclase  
637 Rv1625c inhibits growth of *Mycobacterium tuberculosis* on cholesterol and  
638 modulates intramacrophage signaling. Mol Microbiol 105:294-308.
- 639 21. Bonds AC, Sampson NS. 2018. More than cholesterol catabolism: regulatory  
640 vulnerabilities in *Mycobacterium tuberculosis*. Curr Opin Chem Biol 44:39-46.

- 641 22. Sarathy JP, Dartois V. 2020. Caseum: a Niche for *Mycobacterium tuberculosis* Drug-  
642 Tolerant Persisters. Clin Microbiol Rev 33.
- 643 23. Caseation of human tuberculosis granulomas correlates with elevated host lipid  
644 metabolism.  
645 Kim MJ1, Wainwright HC, Locketz M, Bekker LG, Walther GB, Dittrich C, Visser  
646 A, Wang W, Hsu FF, Wiehart U, Tsenova L, Kaplan G, Russell DG. EMBO  
647 Molecular Medicine, 01 Jul 2010, 2(7):258-274  
648 DOI: 10.1002/emmm.201000079
- 649 24. Irwin SM, Driver E, Lyon E, Schrupp C, Ryan G, Gonzalez-Juarrero M, Basaraba RJ,  
650 Nuermberger EL, Lenaerts AJ. 2015. Presence of multiple lesion types with vastly  
651 different microenvironments in C3HeB/FeJ mice following aerosol infection with  
652 *Mycobacterium tuberculosis*. Dis Model Mech 8:591-602.
- 653 25. Lanoix JP, Lenaerts AJ, Nuermberger EL. 2015. Heterogeneous disease progression  
654 and treatment response in a C3HeB/FeJ mouse model of tuberculosis. Dis Model  
655 Mech 8:603-10.
- 656 26. Pan H, Yan BS, Rojas M, Shebzukhov YV, Zhou H, Kobzik L, Higgins DE, Daly MJ,  
657 Bloom BR, Kramnik I. 2005. Ipr1 gene mediates innate immunity to tuberculosis.  
658 Nature 434:767-72.
- 659 27. Haley CA, Macias P, Jasuja S, Jones BA, Rowlinson M-C, Jaimon R, Onderki P,  
660 Darnall E, Gomez ME, Peloquin C, Ashkin D, Goswami ND. Novel 6-month  
661 Treatment for Drug-Resistant Tuberculosis, US. Emerg Infect Dis. 2021;27(1):332-  
662 334
- 663 28. Schmieder, R. and Edwards, R. (2011). Quality control and preprocessing of  
664 metagenomic datasets. 97 Bioinformatics, 27(6):863–864.

- 665 29. Aronesty E. ea-utils: Command-line tools for processing biological sequencing data.  
666 January 2011 Expression Analysis.
- 667 30. Murphy KC, Campellone KG. Lambda Red-mediated recombinogenic engineering of  
668 enterohemorrhagic and enteropathogenic *E. coli*. *BMC Mol Biol*. 2003;4:11
- 669
